# Supplementary material for: Dinuclear nickel(ii) complexes with 2,5-diamino-1,4-benzoquinonediimine ligands as precatalysts for the polymerization of styrene: electronic and steric substituent effects
Source: Royal Society of Chemistry journal article supplement (doi:10.1039/c4dt02858a), 2014-11-10
Supplement: c4dt02858a1.pdf [file c4dt02858a1.pdf]

## Supplementary information

Dinuclear nickel(II) complexes with  
2,5-diamino-1,4-benzoquinonediimine  
ligands as precatalysts for the  
polymerization of styrene: electronic and  
steric substituent effects

Keiji Ohno,<sup>a</sup> Akira Nagasawa,<sup>a</sup> and Takashi Fujihara,\*

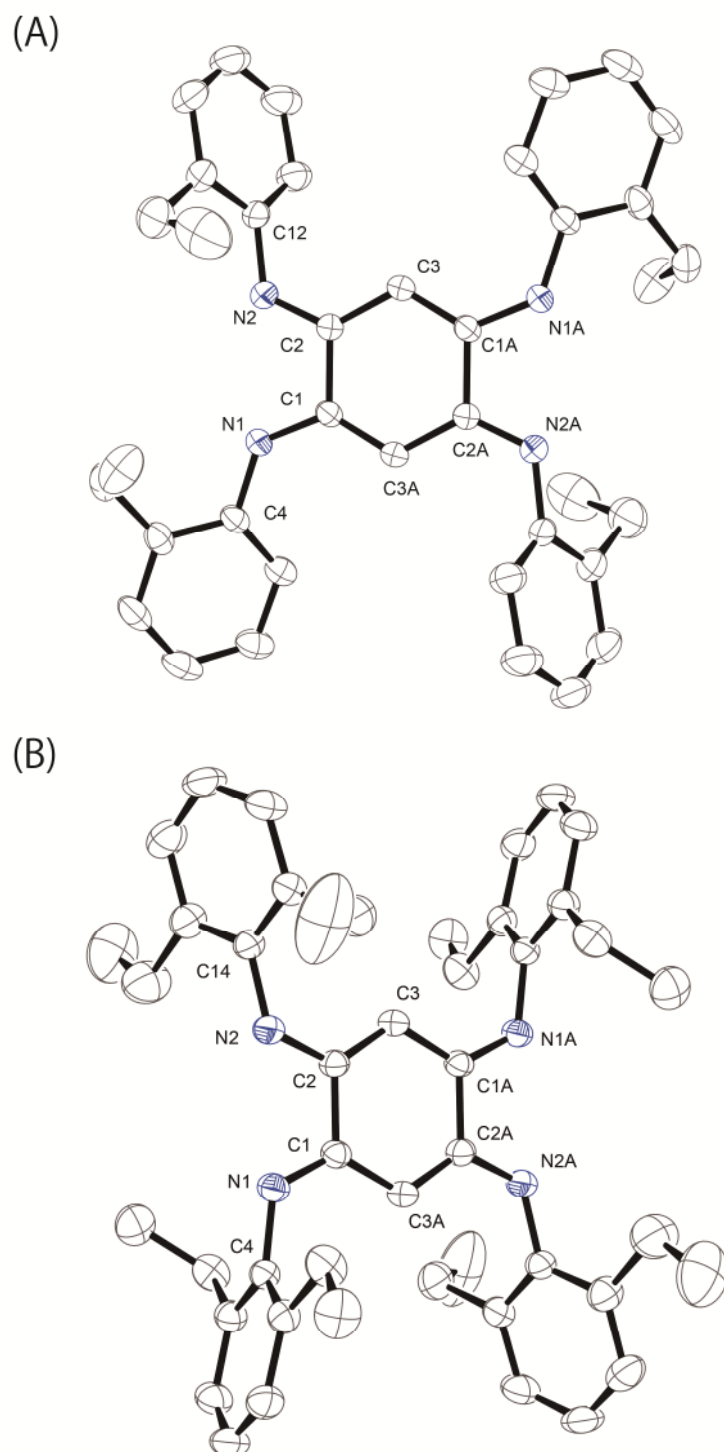

Fig. S1 Molecular structures of (A) 2-EtApH<sub>2</sub> and (B) 2,6-Et<sub>2</sub>ApH<sub>2</sub> with thermal ellipsoids at the 50% probability level. Hydrogen atoms are omitted for clarity.

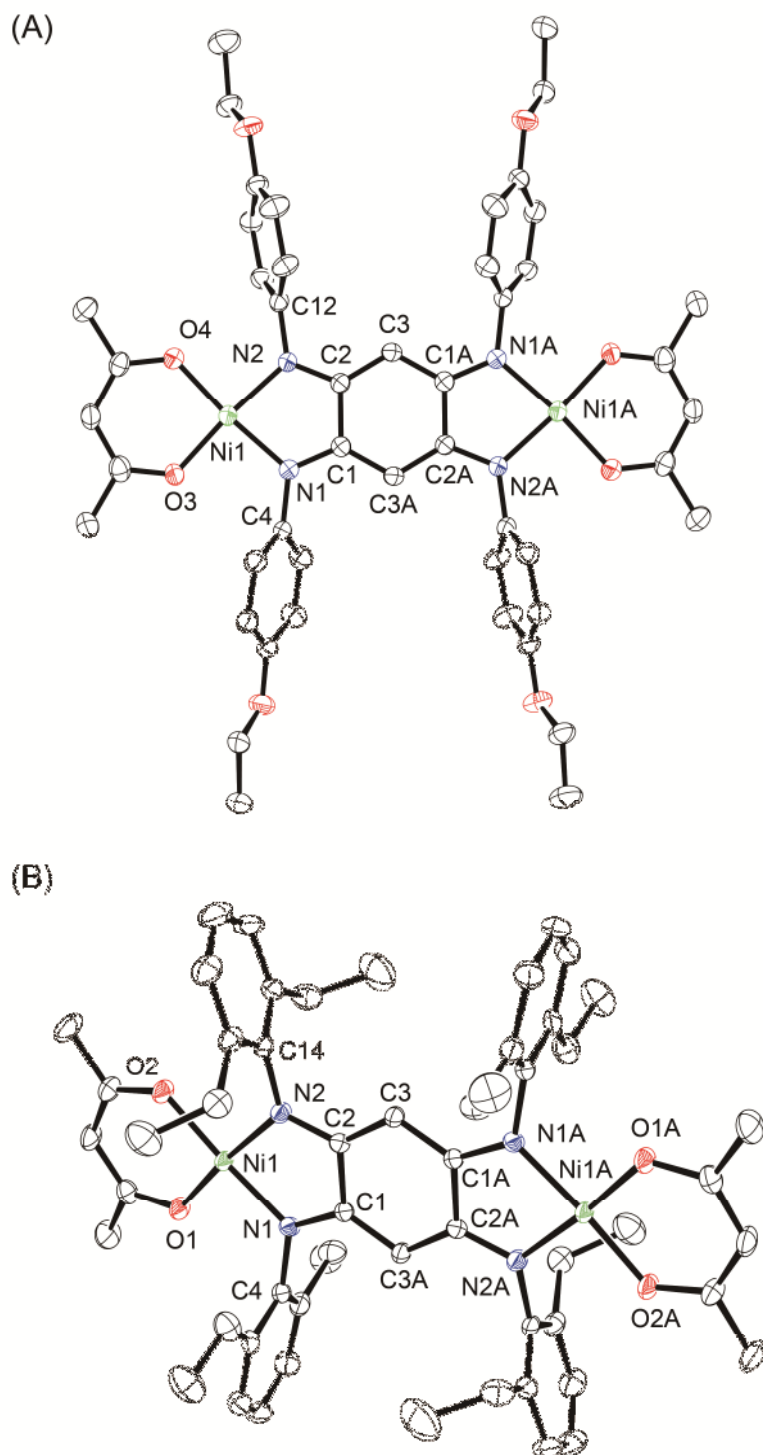

Fig. S2 Molecular structures of (A) **2b** (B) **2e** with thermal ellipsoids at the 50% probability level. Hydrogen atoms and solvent molecules ( $\text{CHCl}_3$ ) are omitted for clarity.

Table S1. Crystallographic data for 2-OEtApH<sub>2</sub>, 2-EtApH<sub>2</sub>, 2,6-Et<sub>2</sub>ApH<sub>2</sub>, **1b**, **1c**, **1e**, and **2c**.

|                                                       | 2-OEtApH <sub>2</sub>                                         | 2-EtApH <sub>2</sub>                           | 2,6-Et <sub>2</sub> ApH <sub>2</sub>           |
|-------------------------------------------------------|---------------------------------------------------------------|------------------------------------------------|------------------------------------------------|
| Empirical formula                                     | C <sub>38</sub> H <sub>40</sub> N <sub>4</sub> O <sub>4</sub> | C <sub>38</sub> H <sub>40</sub> N <sub>4</sub> | C <sub>46</sub> H <sub>56</sub> N <sub>4</sub> |
| fw [g/mol]                                            | 616.74                                                        | 552.74                                         | 664.95                                         |
| cryst system                                          | Monoclinic                                                    | Monoclinic                                     | Triclinic                                      |
| Space group                                           | <i>P2(1)/c</i>                                                | <i>P2(1)/c</i>                                 | <i>P-1</i>                                     |
| <i>a</i> [Å]                                          | 10.680(9)                                                     | 10.5962(6)                                     | 8.4801(6)                                      |
| <i>b</i> [Å]                                          | 9.276(7)                                                      | 7.4665(4)                                      | 10.2051(7)                                     |
| <i>c</i> [Å]                                          | 16.587(13)                                                    | 19.8942(11)                                    | 11.4803(8)                                     |
| $\alpha$ [deg]                                        | 90.00                                                         | 90.00                                          | 83.630(2)                                      |
| $\beta$ [deg]                                         | 99.173(14)                                                    | 90.3650(10)                                    | 85.344(2)                                      |
| $\gamma$ [deg]                                        | 90.00                                                         | 90.00                                          | 80.261(2)                                      |
| <i>V</i> [Å <sup>3</sup> ]                            | 1622(2)                                                       | 1573.93(15)                                    | 971.17(12)                                     |
| <i>Z</i>                                              | 2                                                             | 2                                              | 1                                              |
| Density (calcd) [g/cm <sup>3</sup> ]                  | 1.263                                                         | 1.166                                          | 1.137                                          |
| $\mu$ (mm <sup>-1</sup> )                             | 0.083                                                         | 0.069                                          | 0.066                                          |
| <i>F</i> (000)                                        | 656                                                           | 592                                            | 360                                            |
| Temperature [K]                                       | 173(2)                                                        | 173(2)                                         | 173(2)                                         |
| $\theta_{\max}$ , $\theta_{\min}$ [deg]               | 27.86, 1.93                                                   | 27.89, 1.92                                    | 27.91, 1.79                                    |
| final R indices [ <i>I</i> > 2 $\sigma$ ( <i>I</i> )] | $R_1 = 0.0697^a$<br>$wR_2 = 0.1467^b$                         | $R_1 = 0.0503^a$<br>$wR_2 = 0.1385^b$          | $R_1 = 0.0655^a$<br>$wR_2 = 0.1815^b$          |
| GOF on <i>F</i> <sup>2</sup>                          | 1.043                                                         | 1.048                                          | 1.051                                          |

$$^a R_1 = \Sigma(|F_o| - |F_c|) / \Sigma|F_o|. \quad ^b wR_2 = [\Sigma w(F_o^2 - F_c^2)^2] / \Sigma w(F_o^2)^2]^{1/2}.$$

|                                                       | <b>1b</b>                                                                                     | <b>1c</b>                                                                     | <b>1e</b>                                                                     | <b>2c</b>                                                                        |
|-------------------------------------------------------|-----------------------------------------------------------------------------------------------|-------------------------------------------------------------------------------|-------------------------------------------------------------------------------|----------------------------------------------------------------------------------|
| Empirical formula                                     | C <sub>50</sub> H <sub>54</sub> Cl <sub>6</sub> N <sub>4</sub> Ni <sub>2</sub> O <sub>8</sub> | C <sub>48</sub> H <sub>52</sub> N <sub>4</sub> Ni <sub>2</sub> O <sub>8</sub> | C <sub>56</sub> H <sub>68</sub> N <sub>4</sub> Ni <sub>2</sub> O <sub>4</sub> | C <sub>76</sub> H <sub>80</sub> Cl <sub>2</sub> N <sub>8</sub> NiO <sub>16</sub> |
| fw [g/mol]                                            | 1169.09                                                                                       | 930.36                                                                        | 978.56                                                                        | 1487.06                                                                          |
| cryst system                                          | Triclinic                                                                                     | Monoclinic                                                                    | Triclinic                                                                     | Monoclinic                                                                       |
| Space group                                           | <i>P</i> -1                                                                                   | <i>P</i> 2(1)                                                                 | <i>P</i> -1                                                                   | C2/c                                                                             |
| <i>a</i> [Å]                                          | 10.747(2)                                                                                     | 13.7366(7)                                                                    | 8.4280(8)                                                                     | 27.029(6)                                                                        |
| <i>b</i> [Å]                                          | 11.215(2)                                                                                     | 11.9450(6)                                                                    | 11.7109(10)                                                                   | 13.321(3)                                                                        |
| <i>c</i> [Å]                                          | 12.347(3)                                                                                     | 14.3878(7)                                                                    | 13.9731(13)                                                                   | 25.424(5)                                                                        |
| $\alpha$ [deg]                                        | 103.63(3)                                                                                     | 90.00                                                                         | 113.575(2)                                                                    | 90.00                                                                            |
| $\beta$ [deg]                                         | 109.84(3)                                                                                     | 108.0800(10)                                                                  | 91.422(2)                                                                     | 111.358(3)                                                                       |
| $\gamma$ [deg]                                        | 91.01(3)                                                                                      | 90.00                                                                         | 93.090(2)                                                                     | 90.00                                                                            |
| <i>V</i> [Å <sup>3</sup> ]                            | 1352.5(5)                                                                                     | 2244.24(19)                                                                   | 1260.6(2)                                                                     | 8525(3)                                                                          |
| <i>Z</i>                                              | 1                                                                                             | 2                                                                             | 1                                                                             | 4                                                                                |
| Density (calcd) [g/cm <sup>-3</sup> ]                 | 1.435                                                                                         | 1.377                                                                         | 1.289                                                                         | 1.162                                                                            |
| $\mu$ (mm <sup>-1</sup> )                             | 1.047                                                                                         | 0.897                                                                         | 0.796                                                                         | 0.353                                                                            |
| <i>F</i> (000)                                        | 604                                                                                           | 976                                                                           | 520                                                                           | 3128                                                                             |
| Temperature [K]                                       | 173(2)                                                                                        | 150(2)                                                                        | 173(2)                                                                        | 150(2)                                                                           |
| $\theta_{\max}$ , $\theta_{\min}$ [deg]               | 27.94, 1.81                                                                                   | 27.91, 1.49                                                                   | 27.95, 1.59                                                                   | 26.37, 1.62                                                                      |
| final R indices [ <i>I</i> > 2 $\sigma$ ( <i>I</i> )] | $R_1 = 0.0703^a$<br>$wR_2 = 0.1758^b$                                                         | $R_1 = 0.0371^a$<br>$wR_2 = 0.0899^b$                                         | $R_1 = 0.0649^a$<br>$wR_2 = 0.1287^b$                                         | $R_1 = 0.0826^a$<br>$wR_2 = 0.2385^b$                                            |
| GOF on <i>F</i> <sup>2</sup>                          | 1.003                                                                                         | 1.043                                                                         | 1.002                                                                         | 0.999                                                                            |

$$^a R_1 = \Sigma(|F_o| - |F_c|) / \Sigma|F_o|. \quad ^b wR_2 = [\Sigma w(F_o^2 - F_c^2)^2 / \Sigma w(F_o^2)^2]^{1/2}.$$

Table S2. Selected bond lengths (Å) and angles (deg).

|                 | 2-OEtApH <sub>2</sub> | 2-EtApH <sub>2</sub> | 2,6-Et <sub>2</sub> ApH <sub>2</sub> |
|-----------------|-----------------------|----------------------|--------------------------------------|
| C(1)–C(2)       | 1.486(4)              | 1.4968(16)           | 1.497(2)                             |
| C(1)–C(3A)      | 1.344(4)              | 1.3553(17)           | 1.359(2)                             |
| C(2)–C(3)       | 1.439(3)              | 1.4307(16)           | 1.436(2)                             |
| C(3)–C(4)       |                       |                      |                                      |
| C(4)–C(5)       |                       |                      |                                      |
| C(5)–C(6)       |                       |                      |                                      |
| C(6)–C(1)       |                       |                      |                                      |
| C(1)–N(1)       | 1.358(3)              | 1.3573(15)           | 1.353(2)                             |
| C(2)–N(2)       | 1.274(3)              | 1.2915(15)           | 1.289(2)                             |
| C(4)–N(3)       |                       |                      |                                      |
| C(5)–N(4)       |                       |                      |                                      |
| Ni–N(1)         |                       |                      |                                      |
| Ni–N(2)         |                       |                      |                                      |
| Ni–N(3)         |                       |                      |                                      |
| Ni–N(4)         |                       |                      |                                      |
| Ni–O(1)         |                       |                      |                                      |
| C(1)–N(1)–C(4)  | 129.5(3)              | 129.98(11)           | 125.00(13)                           |
| C(2)–N(2)–C(12) | 121.4(2)              | 121.83(10)           |                                      |
| C(2)–N(2)–C(14) |                       |                      | 122.17(13)                           |
| C(1)–N(1)–C(4)  |                       |                      |                                      |
| C(1)–N(1)–C(7)  |                       |                      |                                      |
| C(2)–N(2)–C(12) |                       |                      |                                      |
| C(2)–N(2)–C(15) |                       |                      |                                      |
| C(4)–N(3)–C(23) |                       |                      |                                      |
| C(5)–N(4)–C(31) |                       |                      |                                      |

|                 | <b>1b</b> | <b>1c</b> | <b>1e</b> | <b>2c</b> |
|-----------------|-----------|-----------|-----------|-----------|
| C(1)–C(2)       | 1.484(6)  | 1.482(3)  | 1.486(4)  | 1.478(6)  |
| C(1)–C(3A)      | 1.405(6)  |           | 1.394(4)  |           |
| C(2)–C(3)       | 1.393(6)  | 1.396(3)  | 1.394(4)  | 1.413(6)  |
| C(3)–C(4)       |           | 1.387(3)  |           | 1.359(6)  |
| C(4)–C(5)       |           | 1.484(3)  |           | 1.498(6)  |
| C(5)–C(6)       |           | 1.401(3)  |           | 1.360(5)  |
| C(6)–C(1)       |           | 1.395(3)  |           | 1.415(5)  |
| C(1)–N(1)       | 1.325(5)  | 1.330(3)  | 1.332(4)  | 1.311(5)  |
| C(2)–N(2)       | 1.325(5)  | 1.322(3)  | 1.322(4)  | 1.306(5)  |
| C(4)–N(3)       |           | 1.336(3)  |           | 1.356(5)  |
| C(5)–N(4)       |           | 1.335(3)  |           | 1.366(5)  |
| Ni–N(1)         | 1.888(3)  | 1.883(2)  | 1.873(3)  | 1.980(3)  |
| Ni–N(2)         | 1.881(3)  | 1.874(2)  | 1.876(3)  | 2.019(4)  |
| Ni–N(3)         |           | 1.889(2)  |           |           |
| Ni–N(4)         |           | 1.882(2)  |           |           |
| Ni–O(1)         |           |           |           |           |
| C(1)–N(1)–C(4)  |           |           | 120.0(3)  |           |
| C(2)–N(2)–C(12) |           |           |           |           |
| C(2)–N(2)–C(14) |           |           | 120.8(3)  |           |
| C(1)–N(1)–C(4)  | 120.0(4)  |           |           |           |
| C(1)–N(1)–C(7)  |           | 119.8(2)  |           | 127.2(3)  |
| C(2)–N(2)–C(12) | 119.8(4)  |           |           |           |
| C(2)–N(2)–C(15) |           | 120.2(2)  |           | 123.1(4)  |
| C(4)–N(3)–C(23) |           | 118.8(2)  |           | 124.8(4)  |
| C(5)–N(4)–C(31) |           | 120.1(2)  |           | 124.7(4)  |

Table 4. Hydrogen bond geometry (Å and °) of 2-OEtApH<sub>2</sub>, 2-EtApH<sub>2</sub>, 2,6-Et<sub>2</sub>ApH<sub>2</sub>, and **2c**.

| Compound                             | D(-H)⋯A  | D-H       | H⋯A       | D⋯A        | D-H⋯A     |
|--------------------------------------|----------|-----------|-----------|------------|-----------|
| 2-OEtApH <sub>2</sub>                | N1-H1⋯N2 | 0.87(3)   | 2.12(3)   | 2.576(4)   | 112(3)    |
| 2-EtApH <sub>2</sub>                 | N1-H1⋯N2 | 0.840(16) | 2.068(15) | 2.5597(14) | 116.9(13) |
| 2,6-Et <sub>2</sub> ApH <sub>2</sub> | N1-H1⋯N2 | 0.87(2)   | 2.10(2)   | 2.5854(19) | 114.5(18) |
| <b>2c</b>                            | N4-H4⋯O8 | 0.85(5)   | 2.17(5)   | 3.009(5)   | 169(4)    |
|                                      | N3-H3⋯O8 | 0.85(5)   | 2.07(5)   | 2.880(6)   | 160(5)    |
